# Supplementary material for: Mucociliary Respiratory Epithelium Integrity in Molecular Defense and Susceptibility to Pulmonary Viral Infections
Source: PubMed Central journal article supplement (PMC7911113; doi:10.3390/biology10020095), 2021-01-29
Supplement: biology-10-00095-s001.pdf [file biology-10-00095-s001.pdf]

# Mucociliary Respiratory Epithelium Integrity in Molecular Defense and Susceptibility to Pulmonary Viral Infections

Adivitiya <sup>1</sup>, Manish Singh Kaushik <sup>1</sup>, Soura Chakraborty <sup>1</sup>, Shobi Veleri <sup>2</sup> and Suneel Kateriya <sup>1,\*</sup>

<sup>1</sup> Laboratory of Optobiology, School of Biotechnology, Jawaharlal Nehru University, New Delhi-110067, India

<sup>2</sup> Drug Safety Division, ICMR-National Institute of Nutrition, Hyderabad-500007, India

\* Correspondence: [skateriya@jnu.ac.in](mailto:skateriya@jnu.ac.in)

## M&M S1. Protein-protein network analysis

To study the molecular mechanism regulating the mucociliary clearance and changes occurring in this machinery following SARS-CoV-2 infection, the proteins reported to be involved either directly or indirectly in this process were selected by referring to relevant research papers and subjected to *in silico* protein-protein interaction analysis. We have included both experimentally validated and predicted protein-protein interactions in our analysis of the protein network. The network of the selected proteins was constructed using String version 11 (Academic Consortium 2020) [1]. The online STRING database integrates available resources having information related to protein-protein interactions [direct (physical) as well as indirect (functional) interactions] for constructing a comprehensive network [1]. STRING, as a tool, utilizes the classification systems based on Gene Ontology and KEGG, high-throughput text-mining as well as on hierarchical clustering of the association network. STRING brings in the functional association between two proteins responsible for the onset of a specific biological function. The evidences supporting the association between two proteins are retrieved from different and independent channels (data sources) available for genomic context information, co-expression, text-mining, biochemical/genetic data, and previously curated pathway and protein-complex knowledge [1]. Each data source generates separate interaction scores as well as the FDR (false discovery rate) value, which represent confidence (on a scale of zero to one) and significance of the association, respectively. The FDR (false discovery rate) approach was employed to assess the significance of the series of tests performed, where *p-value* represents the probability of false positives on a single test [2]. The STRING output was further analyzed with Cytoscape 3.7.2 (San Diego, CA, USA) by employing *Betweenness* centrality algorithm [3]. The *Betweenness* Centrality algorithm determines the shortest path between each pair of nodes in a network [4]. The nodes with high betweenness value actually have the determining hold over the network. Furthermore, clustering of the protein network was performed by employing Markov clustering (MCL) algorithm [5]. Finally, a partial interactome of SARS-CoV-2 and host proteins was extracted from the Network Data Exchange (NDEX) public server ([www.ndexbio.org](http://www.ndexbio.org)) [6-8] representing the IntAct/IMEx Coronavirus Dataset [9] to understand the point of interactions of SARS-CoV-2 proteins in the molecular machinery of mucociliary clearance. The extracted viral-host protein interaction network has been visualized in Cytoscape 3.7.2 (with CyNDEX-2 application) with Compound Spring Embedder (CoSE) layout [3].

## M&M S2. In-silico expression analysis

We have analyzed the expression profile of mucociliary clearance genes from SARS-CoV-2 infected patients versus healthy individuals. We have used RNA-seq dataset (GEO accession: GSE152075) generated through high throughput sequencing of nasopharyngeal swab samples from SARS-CoV-2 infected and healthy individuals [10]. The DESeq 2 (Version 1.26.0) [11] normalization was further performed in R studio (version 4.0.3, <http://www.rstudio.com/>) [12] to calculate the differential expression of transcripts related to mucociliary clearance. Batch correction was performed, log<sub>2</sub> fold changes of each genes and

corresponding *p-values* were calculated (Table S3). Log2 fold change was plotted to analyze the impact of SARS-CoV-2 infection on the expression of genes related to host mucociliary clearance system.

**Table S1:** Table showing string output in terms of various evidence types (GO, local network cluster, KEGG pathway, reactome pathways, annotated keywords and protein domains) contributing to the molecular network of the lung cilia and MCC machinery regulating mucociliary clearance in humans. The string output depicts the network statistics as well as the false discovery rate (FDR) values for each evidence. The evidences with FDR value < 0.05 were considered significant.

| <b><u>Network statistics</u></b>      |                                                |                                          |
|---------------------------------------|------------------------------------------------|------------------------------------------|
| Number of nodes                       | 39                                             |                                          |
| Number of edges                       | 153                                            |                                          |
| Average node degree                   | 7.65                                           |                                          |
| Avg. local clustering coefficient     | 0.69                                           |                                          |
| Expected number of edges              | 22                                             |                                          |
| PPI enrichment <i>p-value</i>         | < 1.0e-16                                      |                                          |
| <b><u>Term ID</u></b>                 | <b><u>Term description</u></b>                 | <b><u>False discovery rate (FDR)</u></b> |
| <b><u>Biological Process (GO)</u></b> |                                                |                                          |
| GO:0060271                            | cilium assembly                                | 1.84E-18                                 |
| GO:0070925                            | organelle assembly                             | 1.19E-16                                 |
| GO:0006270                            | DNA replication initiation                     | 1.46E-14                                 |
| GO:0044772                            | mitotic cell cycle phase transition            | 1.98E-14                                 |
| GO:0030030                            | cell projection organization                   | 2.75E-14                                 |
| GO:0006261                            | DNA-dependent DNA replication                  | 1.29E-13                                 |
| GO:0000082                            | G1/S transition of mitotic cell cycle          | 2.57E-13                                 |
| GO:0000278                            | mitotic cell cycle                             | 2.57E-13                                 |
| GO:0007049                            | cell cycle                                     | 4.80E-13                                 |
| GO:0006260                            | DNA replication                                | 8.81E-13                                 |
| GO:1903047                            | mitotic cell cycle process                     | 8.81E-13                                 |
| GO:0022402                            | cell cycle process                             | 3.00E-12                                 |
| GO:0006996                            | organelle organization                         | 3.43E-12                                 |
| GO:0022607                            | cellular component assembly                    | 4.92E-12                                 |
| GO:1903251                            | multi-ciliated epithelial cell differentiation | 2.28E-09                                 |
| GO:0016043                            | cellular component organization                | 1.30E-08                                 |
| GO:0006259                            | DNA metabolic process                          | 1.33E-08                                 |
| GO:0098534                            | centriole assembly                             | 9.67E-08                                 |
| GO:0007017                            | microtubule-based process                      | 1.13E-07                                 |
| GO:0044458                            | motile cilium assembly                         | 1.34E-07                                 |
| GO:0034645                            | cellular macromolecule biosynthetic process    | 2.09E-07                                 |
| GO:0006268                            | DNA unwinding involved in DNA replication      | 3.39E-07                                 |
| GO:0031023                            | microtubule organizing center organization     | 1.57E-06                                 |
| GO:0000226                            | microtubule cytoskeleton organization          | 4.00E-06                                 |
| GO:0090304                            | nucleic acid metabolic process                 | 1.02E-05                                 |

|            |                                                                                      |          |
|------------|--------------------------------------------------------------------------------------|----------|
| GO:0044260 | cellular macromolecule metabolic process                                             | 1.35E-05 |
| GO:0009888 | tissue development                                                                   | 1.40E-05 |
| GO:0006139 | nucleobase-containing compound metabolic process                                     | 2.85E-05 |
| GO:0060429 | epithelium development                                                               | 3.18E-05 |
| GO:0006275 | regulation of DNA replication                                                        | 6.15E-05 |
| GO:0007507 | heart development                                                                    | 0.00018  |
| GO:1901990 | regulation of mitotic cell cycle phase transition                                    | 0.00021  |
| GO:0009987 | cellular process                                                                     | 0.00028  |
| GO:1901992 | positive regulation of mitotic cell cycle phase transition                           | 0.00032  |
| GO:0060972 | left/right pattern formation                                                         | 0.00041  |
| GO:0007010 | cytoskeleton organization                                                            | 0.00044  |
| GO:0140056 | organelle localization by membrane tethering                                         | 0.00051  |
| GO:0051276 | chromosome organization                                                              | 0.00064  |
| GO:0007346 | regulation of mitotic cell cycle                                                     | 0.00068  |
| GO:0006807 | nitrogen compound metabolic process                                                  | 0.00081  |
| GO:0000083 | regulation of transcription involved in G1/S transition of mitotic cell cycle        | 0.00086  |
| GO:0071163 | DNA replication preinitiation complex assembly                                       | 0.00091  |
| GO:0030855 | epithelial cell differentiation                                                      | 0.001    |
| GO:0097711 | ciliary basal body-plasma membrane docking                                           | 0.0011   |
| GO:0021943 | formation of radial glial scaffolds                                                  | 0.0013   |
| GO:0051726 | regulation of cell cycle                                                             | 0.0015   |
| GO:0098535 | de novo centriole assembly involved in multiciliated epithelial cell differentiation | 0.0018   |
| GO:0007368 | determination of left/right symmetry                                                 | 0.0019   |
| GO:0031503 | protein-containing complex localization                                              | 0.0019   |
| GO:0035735 | intraciliary transport involved in cilium assembly                                   | 0.0019   |
| GO:0048856 | anatomical structure development                                                     | 0.0019   |
| GO:0001714 | endodermal cell fate specification                                                   | 0.0021   |
| GO:0009653 | anatomical structure morphogenesis                                                   | 0.0021   |
| GO:0044237 | cellular metabolic process                                                           | 0.0021   |
| GO:0044238 | primary metabolic process                                                            | 0.0022   |
| GO:0051640 | organelle localization                                                               | 0.0028   |
| GO:0071103 | DNA conformation change                                                              | 0.0032   |
| GO:1902017 | regulation of cilium assembly                                                        | 0.0032   |
| GO:0030154 | cell differentiation                                                                 | 0.0038   |
| GO:0031570 | DNA integrity checkpoint                                                             | 0.0039   |
| GO:0090068 | positive regulation of cell cycle process                                            | 0.0039   |
| GO:0010389 | regulation of G2/M transition of mitotic cell cycle                                  | 0.004    |
| GO:0071704 | organic substance metabolic process                                                  | 0.004    |

|            |                                                              |        |
|------------|--------------------------------------------------------------|--------|
| GO:0098969 | neurotransmitter receptor transport to postsynaptic membrane | 0.004  |
| GO:0001947 | heart looping                                                | 0.0041 |
| GO:0072659 | protein localization to plasma membrane                      | 0.0045 |
| GO:0035563 | positive regulation of chromatin binding                     | 0.0051 |
| GO:0001708 | cell fate specification                                      | 0.0064 |
| GO:0007224 | smoothened signaling pathway                                 | 0.0064 |
| GO:0051302 | regulation of cell division                                  | 0.0067 |
| GO:0000076 | DNA replication checkpoint                                   | 0.0075 |
| GO:0007098 | centrosome cycle                                             | 0.0075 |
| GO:0007099 | centriole replication                                        | 0.0075 |
| GO:0045786 | negative regulation of cell cycle                            | 0.0076 |
| GO:0055007 | cardiac muscle cell differentiation                          | 0.0076 |
| GO:0099632 | protein transport within plasma membrane                     | 0.0081 |
| GO:0032465 | regulation of cytokinesis                                    | 0.0086 |
| GO:0048598 | embryonic morphogenesis                                      | 0.0094 |
| GO:0051668 | localization within membrane                                 | 0.0116 |
| GO:0051052 | regulation of DNA metabolic process                          | 0.0121 |
| GO:0010971 | positive regulation of G2/M transition of mitotic cell cycle | 0.013  |
| GO:0048169 | regulation of long-term neuronal synaptic plasticity         | 0.0139 |
| GO:0048513 | animal organ development                                     | 0.0148 |
| GO:0051984 | positive regulation of chromosome segregation                | 0.0148 |
| GO:0006928 | movement of cell or subcellular component                    | 0.015  |
| GO:0007389 | pattern specification process                                | 0.0154 |
| GO:0002009 | morphogenesis of an epithelium                               | 0.016  |
| GO:0000086 | G2/M transition of mitotic cell cycle                        | 0.0216 |
| GO:0008283 | cell population proliferation                                | 0.024  |
| GO:0007018 | microtubule-based movement                                   | 0.0241 |
| GO:0008156 | negative regulation of DNA replication                       | 0.0241 |
| GO:0045740 | positive regulation of DNA replication                       | 0.0247 |
| GO:0048468 | cell development                                             | 0.0259 |
| GO:0140014 | mitotic nuclear division                                     | 0.0265 |
| GO:2000785 | regulation of autophagosome assembly                         | 0.0266 |
| GO:0051301 | cell division                                                | 0.0277 |
| GO:1905515 | non-motile cilium assembly                                   | 0.029  |
| GO:0090307 | mitotic spindle assembly                                     | 0.0302 |
| GO:2000045 | regulation of G1/S transition of mitotic cell cycle          | 0.0319 |
| GO:0007080 | mitotic metaphase plate congression                          | 0.0321 |
| GO:0003002 | regionalization                                              | 0.0337 |
| GO:0007399 | nervous system development                                   | 0.0337 |
| GO:0090329 | regulation of DNA-dependent DNA replication                  | 0.0342 |

|            |                                                   |        |
|------------|---------------------------------------------------|--------|
| GO:0006974 | cellular response to DNA damage stimulus          | 0.0343 |
| GO:0090102 | cochlea development                               | 0.035  |
| GO:0006355 | regulation of transcription, DNA-templated        | 0.0352 |
|            | negative regulation of DNA-binding                |        |
| GO:0043433 | transcription factor activity                     | 0.0352 |
|            | regulation of cellular macromolecule              |        |
| GO:2000112 | biosynthetic process                              | 0.0352 |
| GO:0007369 | gastrulation                                      | 0.0353 |
| GO:0050794 | regulation of cellular process                    | 0.0368 |
| GO:0098900 | regulation of action potential                    | 0.0375 |
|            | regulation of mitotic metaphase/anaphase          |        |
| GO:0030071 | transition                                        | 0.0382 |
|            | innate immune response-activating signal          |        |
| GO:0002758 | transduction                                      | 0.0397 |
| GO:0051716 | cellular response to stimulus                     | 0.0401 |
|            | regulation of nucleobase-containing compound      |        |
| GO:0019219 | metabolic process                                 | 0.0403 |
| GO:0048731 | system development                                | 0.0405 |
| GO:0035019 | somatic stem cell population maintenance          | 0.0417 |
| GO:0048839 | inner ear development                             | 0.043  |
| GO:0002064 | epithelial cell development                       | 0.0441 |
| GO:0016266 | O-glycan processing                               | 0.0467 |
|            | positive regulation of transcription by RNA       |        |
| GO:0045944 | polymerase II                                     | 0.0477 |
|            | DNA damage response, signal transduction by       |        |
| GO:0006977 | p53 class mediator resulting in cell cycle arrest | 0.0488 |

**Molecular Function (GO)**

|            |                                                   |         |
|------------|---------------------------------------------------|---------|
| GO:0003688 | DNA replication origin binding                    | 0.00076 |
| GO:0004386 | helicase activity                                 | 0.001   |
| GO:1990837 | sequence-specific double-stranded DNA binding     | 0.001   |
| GO:0003677 | DNA binding                                       | 0.0016  |
| GO:0003697 | single-stranded DNA binding                       | 0.0016  |
| GO:0003678 | DNA helicase activity                             | 0.002   |
| GO:0031489 | myosin V binding                                  | 0.0109  |
| GO:0017111 | nucleoside-triphosphatase activity                | 0.0137  |
| GO:1901363 | heterocyclic compound binding                     | 0.0169  |
| GO:0097159 | organic cyclic compound binding                   | 0.0191  |
| GO:0035639 | purine ribonucleoside triphosphate binding        | 0.0234  |
| GO:0003682 | chromatin binding                                 | 0.0267  |
| GO:0032555 | purine ribonucleotide binding                     | 0.0267  |
| GO:0097367 | carbohydrate derivative binding                   | 0.0267  |
|            | transcription regulatory region sequence-specific |         |
| GO:0000976 | DNA binding                                       | 0.0394  |

|            |                                                                                 |        |
|------------|---------------------------------------------------------------------------------|--------|
| GO:0000977 | RNA polymerase II transcription regulatory region sequence-specific DNA binding | 0.0483 |
| GO:0001228 | DNA-binding transcription activator activity, RNA polymerase II-specific        | 0.0483 |

**Cellular component (GO)**

|            |                                                   |          |
|------------|---------------------------------------------------|----------|
| GO:0005814 | centriole                                         | 1.17E-09 |
| GO:0042555 | MCM complex                                       | 3.59E-09 |
| GO:0005815 | microtubule organizing center                     | 4.36E-08 |
| GO:0015630 | microtubule cytoskeleton                          | 1.30E-07 |
| GO:0043232 | intracellular non-membrane-bounded organelle      | 3.94E-07 |
| GO:0005856 | cytoskeleton                                      | 9.50E-07 |
| GO:0043229 | intracellular organelle                           | 4.06E-06 |
| GO:0005929 | cilium                                            | 4.01E-05 |
| GO:0005622 | intracellular                                     | 6.57E-05 |
| GO:0036064 | ciliary basal body                                | 6.57E-05 |
| GO:0030992 | intraciliary transport particle B                 | 0.00019  |
| GO:0005654 | nucleoplasm                                       | 0.0002   |
| GO:0043231 | intracellular membrane-bounded organelle          | 0.0003   |
| GO:0005634 | nucleus                                           | 0.00043  |
| GO:0031981 | nuclear lumen                                     | 0.00043  |
| GO:0097546 | ciliary base                                      | 0.00043  |
| GO:0005813 | centrosome                                        | 0.00045  |
| GO:0043227 | membrane-bounded organelle                        | 0.00045  |
| GO:0098536 | deuterosome                                       | 0.0008   |
| GO:0005694 | chromosome                                        | 0.00096  |
| GO:0070013 | intracellular organelle lumen                     | 0.001    |
| GO:0097542 | ciliary tip                                       | 0.001    |
| GO:0005664 | nuclear origin of replication recognition complex | 0.0016   |
| GO:0042995 | cell projection                                   | 0.0028   |
| GO:0044292 | dendrite terminus                                 | 0.0032   |
| GO:0000228 | nuclear chromosome                                | 0.0039   |
| GO:0005623 | cell                                              | 0.004    |
| GO:0120025 | plasma membrane bounded cell projection           | 0.0072   |
| GO:0032991 | protein-containing complex                        | 0.0079   |
| GO:0005930 | axoneme                                           | 0.0084   |
| GO:0043596 | nuclear replication fork                          | 0.0093   |
| GO:0032391 | photoreceptor connecting cilium                   | 0.0109   |
| GO:0097730 | non-motile cilium                                 | 0.0124   |
| GO:0031514 | motile cilium                                     | 0.0269   |
| GO:0005802 | trans-Golgi network                               | 0.0401   |
| GO:0005794 | Golgi apparatus                                   | 0.041    |
| GO:0099568 | cytoplasmic region                                | 0.041    |

|            |                             |        |
|------------|-----------------------------|--------|
| GO:0055038 | recycling endosome membrane | 0.0453 |
|------------|-----------------------------|--------|

**Local network Cluster (String)**

|          |                                                                                                                                                                   |          |
|----------|-------------------------------------------------------------------------------------------------------------------------------------------------------------------|----------|
| CL:12805 | Activation of the pre-replicative complex                                                                                                                         | 2.39E-18 |
| CL:20274 | mixed, incl. Ciliopathy, and dynein complex nuclear origin of replication recognition                                                                             | 8.94E-10 |
| CL:12807 | complex, and MCM N-terminal domain RFX DNA-binding domain, and multi-ciliated                                                                                     | 4.33E-09 |
| CL:20560 | epithelial cell differentiation                                                                                                                                   | 6.94E-09 |
| CL:12835 | Magnesium chelatase, subunit ChII                                                                                                                                 | 9.89E-06 |
| CL:20430 | intraciliary transport particle B                                                                                                                                 | 0.0001   |
| CL:20562 | RFX1 transcription activation region, and Poxvirus D5 protein-like                                                                                                | 0.00098  |
| CL:26973 | Defective GALNT3 causes familial hyperphosphatemic tumoral calcinosis (HFTC)                                                                                      | 0.00098  |
|          | POU5F1 (OCT4), SOX2, NANOG repress genes related to differentiation, and RNA polymerase II sequence-specific DNA-binding transcription factor recruiting activity | 0.00098  |
| CL:6326  |                                                                                                                                                                   | 0.00098  |
| CL:20275 | Ciliopathy, and dynein complex                                                                                                                                    | 0.0019   |
| CL:20433 | intraciliary transport particle B                                                                                                                                 | 0.0021   |
| CL:19898 | ciliary basal body-plasma membrane docking, and gamma-tubulin complex                                                                                             | 0.0055   |
| CL:19904 | ciliary basal body-plasma membrane docking                                                                                                                        | 0.0164   |

**KEGG Pathways**

|          |                 |          |
|----------|-----------------|----------|
| hsa04110 | Cell cycle      | 2.27E-10 |
| hsa03030 | DNA replication | 4.45E-07 |

**Reactome Pathways**

|             |                                                     |          |
|-------------|-----------------------------------------------------|----------|
| HSA-68962   | Activation of the pre-replicative complex           | 1.35E-16 |
| HSA-69206   | G1/S Transition                                     | 5.15E-15 |
|             | Activation of ATR in response to replication stress | 8.66E-13 |
| HSA-176187  |                                                     | 8.66E-13 |
| HSA-68867   | Assembly of the pre-replicative complex             | 8.66E-13 |
| HSA-69278   | Cell Cycle, Mitotic                                 | 8.66E-13 |
| HSA-68949   | Orc1 removal from chromatin                         | 4.88E-11 |
| HSA-69481   | G2/M Checkpoints                                    | 3.98E-10 |
| HSA-69242   | S Phase                                             | 5.75E-10 |
| HSA-176974  | Unwinding of DNA                                    | 1.67E-09 |
| HSA-5617833 | Cilium Assembly                                     | 3.11E-09 |
| HSA-539107  | Activation of E2F1 target genes at G1/S             | 5.15E-06 |
| HSA-69205   | G1/S-Specific Transcription                         | 5.15E-06 |
| HSA-5620912 | Anchoring of the basal body to the plasma membrane  | 1.71E-05 |

|             |                                                                                                          |          |
|-------------|----------------------------------------------------------------------------------------------------------|----------|
| HSA-68827   | CDT1 association with the CDC6:ORC:origin complex                                                        | 5.83E-05 |
| HSA-1538133 | G0 and Early G1                                                                                          | 0.00026  |
| HSA-2565942 | Regulation of PLK1 Activity at G2/M Transition                                                           | 0.00026  |
| HSA-2892245 | POU5F1 (OCT4), SOX2, NANOG repress genes related to differentiation                                      | 0.00031  |
| HSA-5620920 | Cargo trafficking to the periciliary membrane                                                            | 0.0013   |
| HSA-5620924 | Intraflagellar transport                                                                                 | 0.0013   |
| HSA-113507  | E2F-enabled inhibition of pre-replication complex formation                                              | 0.0015   |
| HSA-68689   | CDC6 association with the ORC:origin complex                                                             | 0.0021   |
| HSA-2892247 | POU5F1 (OCT4), SOX2, NANOG activate genes related to proliferation                                       | 0.0024   |
| HSA-380259  | Loss of Nlp from mitotic centrosomes                                                                     | 0.0026   |
| HSA-8854518 | AURKA Activation by TPX2                                                                                 | 0.0027   |
| HSA-1362300 | Transcription of E2F targets under negative control by p107 (RBL1) and p130 (RBL2) in complex with HDAC1 | 0.0035   |
| HSA-380270  | Recruitment of mitotic centrosome proteins and complexes                                                 | 0.0035   |
| HSA-5083625 | Defective GALNT3 causes familial hyperphosphatemic tumoral calcinosis (HFTC)                             | 0.0035   |
| HSA-5083632 | Defective C1GALT1C1 causes Tn polyagglutination syndrome (TNPS)                                          | 0.0035   |
| HSA-5083636 | Defective GALNT12 causes colorectal cancer 1 (CRCS1)                                                     | 0.0035   |
| HSA-6804114 | TP53 Regulates Transcription of Genes Involved in G2 Cell Cycle Arrest                                   | 0.0035   |
| HSA-1362277 | Transcription of E2F targets under negative control by DREAM complex                                     | 0.0038   |
| HSA-380320  | Recruitment of NuMA to mitotic centrosomes                                                               | 0.0041   |
| HSA-5620916 | VxPx cargo-targeting to cilium                                                                           | 0.0044   |
| HSA-977068  | Termination of O-glycan biosynthesis                                                                     | 0.0047   |
| HSA-5621480 | Dectin-2 family                                                                                          | 0.0061   |
| HSA-3769402 | Deactivation of the beta-catenin transactivating complex                                                 | 0.0137   |
| HSA-8854214 | TBC/RABGAPs                                                                                              | 0.0147   |
| HSA-8873719 | RAB geranyl geranylation                                                                                 | 0.0279   |
| HSA-201681  | TCF dependent signaling in response to WNT                                                               | 0.028    |
| HSA-1445148 | Translocation of SLC2A4 (GLUT4) to the plasma membrane                                                   | 0.0314   |

**Annotated Keywords**  
**(UniProt)**

|         |                               |          |
|---------|-------------------------------|----------|
| KW-0970 | Cilium biogenesis/degradation | 8.68E-19 |
| KW-0235 | DNA replication               | 4.96E-13 |



|         |                            |          |
|---------|----------------------------|----------|
| KW-0131 | Cell cycle                 | 3.35E-11 |
| KW-1186 | Ciliopathy                 | 1.24E-05 |
| KW-0969 | Cilium                     | 1.79E-05 |
| KW-0539 | Nucleus                    | 3.08E-05 |
| KW-0206 | Cytoskeleton               | 4.10E-05 |
| KW-0347 | Helicase                   | 0.00013  |
| KW-0238 | DNA-binding                | 0.00018  |
| KW-0175 | Coiled coil                | 0.0005   |
| KW-0990 | Primary ciliary dyskinesia | 0.00055  |
| KW-0966 | Cell projection            | 0.00059  |
| KW-0242 | Dwarfism                   | 0.0021   |
| KW-0010 | Activator                  | 0.0025   |
| KW-0832 | Ubl conjugation            | 0.0037   |
| KW-0597 | Phosphoprotein             | 0.004    |
| KW-0963 | Cytoplasm                  | 0.004    |
| KW-0132 | Cell division              | 0.005    |
| KW-1017 | Isopeptide bond            | 0.0091   |
| KW-0498 | Mitosis                    | 0.0098   |
| KW-0547 | Nucleotide-binding         | 0.0098   |
| KW-9995 | Disease                    | 0.0098   |
| KW-0225 | Disease mutation           | 0.0184   |

**Protein domains (Pfam)**

|         |                                                                 |          |
|---------|-----------------------------------------------------------------|----------|
| PF01078 | Magnesium chelatase, subunit ChII                               | 7.24E-10 |
| PF14551 | MCM N-terminal domain                                           | 7.24E-10 |
| PF17207 | MCM OB domain                                                   | 7.24E-10 |
| PF00493 | MCM2/3/5 family                                                 | 7.81E-10 |
| PF07726 | ATPase family associated with various cellular activities (AAA) | 3.18E-06 |
| PF07412 | Geminin                                                         | 0.00023  |
| PF07728 | AAA domain (dynein-related subfamily)                           | 0.00048  |
| PF13330 | Mucin-2 protein WxxW repeating region                           | 0.00061  |
| PF01826 | Trypsin Inhibitor like cysteine rich domain                     | 0.0017   |
| PF08742 | C8 domain                                                       | 0.0017   |
| PF00094 | von Willebrand factor type D domain                             | 0.0025   |
| PF08477 | Ras of Complex, Roc, domain of DAP kinase                       | 0.0211   |
| PF00250 | Forkhead domain                                                 | 0.0217   |
| PF00025 | ADP-ribosylation factor family                                  | 0.0221   |
| PF00071 | Ras family                                                      | 0.0221   |

**Protein domains (SMART)**

|         |                                                          |          |
|---------|----------------------------------------------------------|----------|
| SM00350 | minichromosome maintenance proteins                      | 9.36E-10 |
| SM00382 | ATPases associated with a variety of cellular activities | 0.0031   |

|         |                                                                                                                                                                                                                                            |        |
|---------|--------------------------------------------------------------------------------------------------------------------------------------------------------------------------------------------------------------------------------------------|--------|
|         | This domain contains 8 conserved cysteine residues, but this family only contains 7 of them to overlaps with other domains. It is found in disease-related proteins including von Willebrand factor, Alpha tectorin, Zonadhesin and Mucin. | 0.0031 |
| SM00832 |                                                                                                                                                                                                                                            |        |
| SM00216 | von Willebrand factor (vWF) type D domain                                                                                                                                                                                                  | 0.0037 |
| SM00041 | C-terminal cystine knot-like domain (CTCK)                                                                                                                                                                                                 | 0.0049 |
| SM00214 | von Willebrand factor (vWF) type C domain                                                                                                                                                                                                  | 0.0116 |
| SM00339 | FORKHEAD                                                                                                                                                                                                                                   | 0.0187 |
| SM00175 | Rab subfamily of small GTPases                                                                                                                                                                                                             | 0.0255 |

GO: gene ontology; KEGG: Kyoto encyclopedia of gene and genomes; pfam: Protein family database; SMART: Simple modular architecture research tool.

**Table S2:** String output in terms of various evidence types (GO, local network cluster, KEGG pathway, reactome pathways, annotated keywords and protein domains) contributing to the network representing the SARS-CoV-2 infection induced implications in the molecular machinery regulating mucociliary clearance. The string output depicts the network statistics as well as the false discovery rate (FDR) values for each evidence. The evidences with FDR value < 0.05 were considered significant.

#### Network Statistics

|                                   |           |
|-----------------------------------|-----------|
| Number of nodes                   | 36        |
| Number of edges                   | 109       |
| Average node degree               | 6.06      |
| Avg. local clustering coefficient | 0.583     |
| Expected number of edges          | 38        |
| PPI enrichment p-value            | < 1.0e-16 |

#### Term ID

#### Term description

#### False discovery rate (FDR)

#### Biological Process (GO)

|            |                                                         |          |
|------------|---------------------------------------------------------|----------|
| GO:0006928 | movement of cell or sub-cellular component              | 7.96E-10 |
| GO:0060271 | cilium assembly                                         | 7.96E-10 |
| GO:0120031 | plasma membrane bounded cell projection assembly        | 7.96E-10 |
| GO:0051179 | localization                                            | 1.25E-08 |
| GO:0051240 | positive regulation of multicellular organismal process | 1.50E-08 |
| GO:0032103 | positive regulation of response to external stimulus    | 2.17E-08 |
| GO:1903530 | regulation of secretion by cell                         | 3.57E-08 |
| GO:0032879 | regulation of localization                              | 4.93E-08 |
| GO:0051049 | regulation of transport                                 | 5.79E-08 |
| GO:0051094 | positive regulation of developmental process            | 6.33E-08 |
| GO:1901701 | cellular response to oxygen-containing compound         | 6.33E-08 |
| GO:0048870 | cell motility                                           | 6.95E-08 |
| GO:0050714 | positive regulation of protein secretion                | 8.64E-08 |

|            |                                                                  |          |
|------------|------------------------------------------------------------------|----------|
| GO:0040011 | locomotion                                                       | 9.29E-08 |
| GO:0032101 | regulation of response to external stimulus                      | 9.65E-08 |
| GO:0051223 | regulation of protein transport                                  | 1.03E-07 |
| GO:0048518 | positive regulation of biological process                        | 1.04E-07 |
| GO:0051222 | positive regulation of protein transport                         | 1.19E-07 |
| GO:1903532 | positive regulation of secretion by cell                         | 1.19E-07 |
| GO:0120036 | plasma membrane bounded cell projection organization             | 1.81E-07 |
| GO:0010243 | response to organonitrogen compound                              | 2.44E-07 |
| GO:0002684 | positive regulation of immune system process                     | 2.56E-07 |
| GO:0050900 | leukocyte migration                                              | 2.57E-07 |
| GO:0048584 | positive regulation of response to stimulus                      | 2.84E-07 |
| GO:0050708 | regulation of protein secretion                                  | 2.91E-07 |
| GO:0035690 | cellular response to drug                                        | 3.49E-07 |
| GO:0042127 | regulation of cell population proliferation                      | 4.43E-07 |
| GO:0002682 | regulation of immune system process                              | 5.92E-07 |
| GO:0071222 | cellular response to lipopolysaccharide                          | 7.31E-07 |
| GO:0048583 | regulation of response to stimulus                               | 7.35E-07 |
| GO:0042129 | regulation of T cell proliferation                               | 8.51E-07 |
| GO:0016477 | cell migration                                                   | 8.68E-07 |
| GO:0071396 | cellular response to lipid                                       | 8.68E-07 |
| GO:0035735 | intraciliary transport involved in cilium assembly               | 1.07E-06 |
| GO:0045766 | positive regulation of angiogenesis                              | 1.22E-06 |
| GO:2000379 | positive regulation of reactive oxygen species metabolic process | 1.47E-06 |
| GO:0048522 | positive regulation of cellular process                          | 1.54E-06 |
| GO:2000377 | regulation of reactive oxygen species metabolic process          | 1.54E-06 |
| GO:0008284 | positive regulation of cell population proliferation             | 1.73E-06 |
| GO:0045765 | regulation of angiogenesis                                       | 1.97E-06 |
| GO:0051050 | positive regulation of transport                                 | 1.97E-06 |
| GO:1903037 | regulation of leukocyte cell-cell adhesion                       | 1.97E-06 |
| GO:0060326 | cell chemotaxis                                                  | 2.19E-06 |
| GO:0010469 | regulation of signaling receptor activity                        | 3.03E-06 |
| GO:0032496 | response to lipopolysaccharide                                   | 3.03E-06 |
| GO:0032675 | regulation of interleukin-6 production                           | 3.10E-06 |
| GO:0051704 | multi-organism process                                           | 3.50E-06 |
| GO:0022603 | regulation of anatomical structure morphogenesis                 | 3.54E-06 |
| GO:0030335 | positive regulation of cell migration                            | 4.16E-06 |
| GO:0001936 | regulation of endothelial cell proliferation                     | 4.30E-06 |
| GO:0030155 | regulation of cell adhesion                                      | 5.01E-06 |
| GO:0002687 | positive regulation of leukocyte migration                       | 5.19E-06 |
| GO:0002706 | regulation of lymphocyte mediated immunity                       | 6.56E-06 |

|            |                                                                                                                                         |          |
|------------|-----------------------------------------------------------------------------------------------------------------------------------------|----------|
| GO:0007507 | heart development                                                                                                                       | 6.74E-06 |
| GO:0071417 | cellular response to organonitrogen compound                                                                                            | 6.74E-06 |
| GO:0002822 | regulation of adaptive immune response based on somatic recombination of immune receptors built from immunoglobulin superfamily domains | 6.82E-06 |
| GO:0043900 | regulation of multi-organism process                                                                                                    | 6.97E-06 |
| GO:0023051 | regulation of signaling                                                                                                                 | 7.19E-06 |
| GO:0002718 | regulation of cytokine production involved in immune response                                                                           | 7.46E-06 |
| GO:0050921 | positive regulation of chemotaxis                                                                                                       | 7.46E-06 |
| GO:0065007 | biological regulation                                                                                                                   | 8.35E-06 |
| GO:0031325 | positive regulation of cellular metabolic process                                                                                       | 8.90E-06 |
| GO:0010817 | regulation of hormone levels                                                                                                            | 9.26E-06 |
| GO:0043410 | positive regulation of MAPK cascade                                                                                                     | 9.31E-06 |
| GO:0032800 | receptor biosynthetic process                                                                                                           | 9.40E-06 |
| GO:0045944 | positive regulation of transcription by RNA polymerase II                                                                               | 1.11E-05 |
| GO:0042493 | response to drug                                                                                                                        | 1.21E-05 |
| GO:2000026 | regulation of multicellular organismal development                                                                                      | 1.22E-05 |
| GO:0045597 | positive regulation of cell differentiation                                                                                             | 1.29E-05 |
| GO:0034613 | cellular protein localization                                                                                                           | 1.36E-05 |
| GO:0046883 | regulation of hormone secretion                                                                                                         | 1.36E-05 |
| GO:0007166 | cell surface receptor signaling pathway                                                                                                 | 1.42E-05 |
| GO:0050789 | regulation of biological process                                                                                                        | 1.54E-05 |
| GO:0071310 | cellular response to organic substance                                                                                                  | 1.59E-05 |
| GO:1902115 | regulation of organelle assembly                                                                                                        | 1.83E-05 |
| GO:0015833 | peptide transport                                                                                                                       | 1.88E-05 |
| GO:0001938 | positive regulation of endothelial cell proliferation                                                                                   | 1.94E-05 |
| GO:0033036 | macromolecule localization                                                                                                              | 2.04E-05 |
| GO:0071705 | nitrogen compound transport                                                                                                             | 2.04E-05 |
| GO:0044070 | regulation of anion transport                                                                                                           | 2.10E-05 |
| GO:0045893 | positive regulation of transcription, DNA-templated                                                                                     | 2.10E-05 |
| GO:0050794 | regulation of cellular process                                                                                                          | 2.17E-05 |
| GO:0051173 | positive regulation of nitrogen compound metabolic process                                                                              | 2.20E-05 |
| GO:0050679 | positive regulation of epithelial cell proliferation                                                                                    | 2.25E-05 |
| GO:0043112 | receptor metabolic process                                                                                                              | 2.38E-05 |
| GO:0010646 | regulation of cell communication                                                                                                        | 2.46E-05 |
| GO:0042035 | regulation of cytokine biosynthetic process                                                                                             | 2.46E-05 |
| GO:0071702 | organic substance transport                                                                                                             | 2.82E-05 |
| GO:0010557 | positive regulation of macromolecule biosynthetic process                                                                               | 2.86E-05 |

|            |                                                                         |          |
|------------|-------------------------------------------------------------------------|----------|
| GO:0070887 | cellular response to chemical stimulus                                  | 2.86E-05 |
| GO:0048468 | cell development                                                        | 2.87E-05 |
| GO:0001817 | regulation of cytokine production                                       | 2.95E-05 |
| GO:0045935 | positive regulation of nucleobase-containing compound metabolic process | 2.99E-05 |
| GO:0072359 | circulatory system development                                          | 2.99E-05 |
| GO:0050678 | regulation of epithelial cell proliferation                             | 3.23E-05 |
| GO:0010604 | positive regulation of macromolecule metabolic process                  | 3.73E-05 |
| GO:0010628 | positive regulation of gene expression                                  | 4.08E-05 |
| GO:0043903 | regulation of symbiosis, encompassing mutualism through parasitism      | 4.08E-05 |
| GO:0045073 | regulation of chemokine biosynthetic process                            | 4.08E-05 |
| GO:0031328 | positive regulation of cellular biosynthetic process                    | 4.55E-05 |
| GO:1903793 | positive regulation of anion transport                                  | 4.74E-05 |
| GO:0050727 | regulation of inflammatory response                                     | 5.12E-05 |
| GO:0006935 | chemotaxis                                                              | 5.17E-05 |
| GO:0010033 | response to organic substance                                           | 5.19E-05 |
| GO:0014070 | response to organic cyclic compound                                     | 5.27E-05 |
| GO:0050776 | regulation of immune response                                           | 5.27E-05 |
| GO:0051353 | positive regulation of oxidoreductase activity                          | 5.27E-05 |
| GO:0031347 | regulation of defense response                                          | 5.42E-05 |
| GO:1902017 | regulation of cilium assembly                                           | 5.53E-05 |
| GO:0034116 | positive regulation of heterotypic cell-cell adhesion                   | 5.63E-05 |
| GO:0050729 | positive regulation of inflammatory response                            | 5.63E-05 |
| GO:0071495 | cellular response to endogenous stimulus                                | 5.63E-05 |
| GO:0009719 | response to endogenous stimulus                                         | 5.69E-05 |
| GO:0051270 | regulation of cellular component movement                               | 5.70E-05 |
| GO:0002889 | regulation of immunoglobulin mediated immune response                   | 5.73E-05 |
| GO:0071407 | cellular response to organic cyclic compound                            | 5.73E-05 |
| GO:0031503 | protein-containing complex localization                                 | 5.92E-05 |
| GO:0045428 | regulation of nitric oxide biosynthetic process                         | 6.40E-05 |
| GO:0051716 | cellular response to stimulus                                           | 6.68E-05 |
| GO:0043434 | response to peptide hormone                                             | 6.89E-05 |
| GO:0031349 | positive regulation of defense response                                 | 7.23E-05 |
| GO:1905952 | regulation of lipid localization                                        | 7.27E-05 |
| GO:0030595 | leukocyte chemotaxis                                                    | 7.33E-05 |
| GO:0050896 | response to stimulus                                                    | 7.33E-05 |
| GO:0042130 | negative regulation of T cell proliferation                             | 7.40E-05 |
| GO:0008104 | protein localization                                                    | 7.72E-05 |
| GO:0022409 | positive regulation of cell-cell adhesion                               | 7.86E-05 |
| GO:0045785 | positive regulation of cell adhesion                                    | 8.12E-05 |
| GO:0071375 | cellular response to peptide hormone stimulus                           | 9.14E-05 |

|            |                                                                  |          |
|------------|------------------------------------------------------------------|----------|
| GO:0051384 | response to glucocorticoid                                       | 9.39E-05 |
| GO:0044093 | positive regulation of molecular function                        | 9.42E-05 |
| GO:0002637 | regulation of immunoglobulin production                          | 9.76E-05 |
| GO:0006810 | transport                                                        | 9.91E-05 |
| GO:0051091 | positive regulation of DNA-binding transcription factor activity | 9.95E-05 |
| GO:0001819 | positive regulation of cytokine production                       | 0.0001   |
| GO:0022607 | cellular component assembly                                      | 0.00011  |
| GO:0051090 | regulation of DNA-binding transcription factor activity          | 0.00012  |
| GO:0043406 | positive regulation of MAP kinase activity                       | 0.00013  |
| GO:1901576 | organic substance biosynthetic process                           | 0.00014  |
| GO:0051701 | interaction with host                                            | 0.00015  |
| GO:0072659 | protein localization to plasma membrane                          | 0.00015  |
| GO:0007018 | microtubule-based movement                                       | 0.00016  |
| GO:0007017 | microtubule-based process                                        | 0.00017  |
| GO:0007165 | signal transduction                                              | 0.00017  |
| GO:0007346 | regulation of mitotic cell cycle                                 | 0.00017  |
| GO:0032642 | regulation of chemokine production                               | 0.00017  |
| GO:0032755 | positive regulation of interleukin-6 production                  | 0.00017  |
| GO:0061138 | morphogenesis of a branching epithelium                          | 0.00017  |
| GO:0006955 | immune response                                                  | 0.00018  |
| GO:0120032 | regulation of plasma membrane bounded cell projection assembly   | 0.00018  |
| GO:0044458 | motile cilium assembly                                           | 0.00019  |
| GO:0060429 | epithelium development                                           | 0.00019  |
| GO:0080134 | regulation of response to stress                                 | 0.00019  |
| GO:0002719 | negative regulation of cytokine production                       | 0.0002   |
| GO:0006886 | involved in immune response                                      | 0.0002   |
| GO:0006886 | intracellular protein transport                                  | 0.0002   |
| GO:0051043 | regulation of membrane protein ectodomain proteolysis            | 0.0002   |
| GO:0051641 | cellular localization                                            | 0.0002   |
| GO:0048661 | positive regulation of smooth muscle cell proliferation          | 0.00021  |
| GO:0050796 | regulation of insulin secretion                                  | 0.00021  |
| GO:0050792 | regulation of viral process                                      | 0.00022  |
| GO:0009725 | response to hormone                                              | 0.00024  |
| GO:0001568 | blood vessel development                                         | 0.00025  |
| GO:0002675 | positive regulation of acute inflammatory response               | 0.00025  |
| GO:0033365 | protein localization to organelle                                | 0.00025  |
| GO:0045940 | positive regulation of steroid metabolic process                 | 0.00025  |
| GO:0051241 | negative regulation of multicellular organismal process          | 0.00025  |

|            |                                                                                                                                                  |         |
|------------|--------------------------------------------------------------------------------------------------------------------------------------------------|---------|
| GO:0010647 | positive regulation of cell communication                                                                                                        | 0.00026 |
| GO:0019221 | cytokine-mediated signaling pathway                                                                                                              | 0.00026 |
| GO:0023056 | positive regulation of signaling                                                                                                                 | 0.00026 |
| GO:0044087 | regulation of cellular component biogenesis                                                                                                      | 0.00026 |
| GO:0002708 | positive regulation of lymphocyte mediated immunity                                                                                              | 0.00028 |
| GO:0007435 | salivary gland morphogenesis                                                                                                                     | 0.00028 |
| GO:0002824 | positive regulation of adaptive immune response based on somatic recombination of immune receptors built from immunoglobulin superfamily domains | 0.00029 |
| GO:0006954 | inflammatory response                                                                                                                            | 0.00029 |
| GO:0008285 | negative regulation of cell population proliferation                                                                                             | 0.00029 |
| GO:0065009 | regulation of molecular function                                                                                                                 | 0.0003  |
| GO:0002690 | positive regulation of leukocyte chemotaxis                                                                                                      | 0.00031 |
| GO:0042036 | negative regulation of cytokine biosynthetic process                                                                                             | 0.00031 |
| GO:0046718 | viral entry into host cell                                                                                                                       | 0.00031 |
| GO:0001569 | branching involved in blood vessel morphogenesis                                                                                                 | 0.00033 |
| GO:0045595 | regulation of cell differentiation                                                                                                               | 0.00035 |
| GO:0002874 | regulation of chronic inflammatory response to antigenic stimulus                                                                                | 0.00036 |
| GO:0010595 | positive regulation of endothelial cell migration                                                                                                | 0.00036 |
| GO:0031663 | lipopolysaccharide-mediated signaling pathway                                                                                                    | 0.00036 |
| GO:0032649 | regulation of interferon-gamma production                                                                                                        | 0.00036 |
| GO:0060559 | positive regulation of calcidiol 1-monooxygenase activity                                                                                        | 0.00036 |
| GO:0071704 | organic substance metabolic process                                                                                                              | 0.00036 |
| GO:0010574 | regulation of vascular endothelial growth factor production                                                                                      | 0.00038 |
| GO:0051707 | response to other organism                                                                                                                       | 0.00038 |
| GO:1903039 | positive regulation of leukocyte cell-cell adhesion                                                                                              | 0.00038 |
| GO:1904707 | positive regulation of vascular smooth muscle cell proliferation                                                                                 | 0.00038 |
| GO:0032892 | positive regulation of organic acid transport                                                                                                    | 0.0004  |
| GO:0044057 | regulation of system process                                                                                                                     | 0.0004  |
| GO:0002376 | immune system process                                                                                                                            | 0.00041 |
| GO:0048856 | anatomical structure development                                                                                                                 | 0.00041 |
| GO:0032501 | multicellular organismal process                                                                                                                 | 0.00043 |
| GO:0044419 | interspecies interaction between organisms                                                                                                       | 0.00043 |
| GO:0097529 | myeloid leukocyte migration                                                                                                                      | 0.00043 |
| GO:0030154 | cell differentiation                                                                                                                             | 0.00044 |
| GO:0071345 | cellular response to cytokine stimulus                                                                                                           | 0.00044 |
| GO:0043491 | protein kinase B signaling                                                                                                                       | 0.00045 |

|            |                                                           |         |
|------------|-----------------------------------------------------------|---------|
| GO:0001990 | regulation of systemic arterial blood pressure by hormone | 0.00047 |
| GO:0030730 | sequestering of triglyceride                              | 0.00047 |
| GO:0051781 | positive regulation of cell division                      | 0.00047 |
| GO:0060300 | regulation of cytokine activity                           | 0.00047 |
| GO:0031323 | regulation of cellular metabolic process                  | 0.00049 |
| GO:0032715 | negative regulation of interleukin-6 production           | 0.00054 |
| GO:0061512 | protein localization to cilium                            | 0.00054 |
| GO:1903672 | positive regulation of sprouting angiogenesis             | 0.00054 |
| GO:0019218 | regulation of steroid metabolic process                   | 0.00055 |
| GO:0071236 | cellular response to antibiotic                           | 0.00055 |
| GO:0002698 | negative regulation of immune effector process            | 0.00056 |
| GO:0035556 | intracellular signal transduction                         | 0.00058 |
| GO:0007368 | determination of left/right symmetry                      | 0.00059 |
| GO:0048514 | blood vessel morphogenesis                                | 0.0006  |
| GO:0009605 | response to external stimulus                             | 0.00062 |
| GO:0050715 | positive regulation of cytokine secretion                 | 0.00062 |
| GO:0050864 | regulation of B cell activation                           | 0.00064 |
| GO:0016032 | viral process                                             | 0.00066 |
| GO:0045429 | positive regulation of nitric oxide biosynthetic process  | 0.00068 |
| GO:0055025 | positive regulation of cardiac muscle tissue development  | 0.00068 |
| GO:0043902 | positive regulation of multi-organism process             | 0.0007  |
| GO:0035295 | tube development                                          | 0.00071 |
| GO:0032870 | cellular response to hormone stimulus                     | 0.00074 |
| GO:0071347 | cellular response to interleukin-1                        | 0.00075 |
| GO:0001818 | negative regulation of cytokine production                | 0.00076 |
| GO:0050778 | positive regulation of immune response                    | 0.00077 |
| GO:0060976 | coronary vasculature development                          | 0.00079 |
| GO:1903522 | regulation of blood circulation                           | 0.00081 |
| GO:0001822 | kidney development                                        | 0.00082 |
| GO:0007389 | pattern specification process                             | 0.00082 |
| GO:0045599 | negative regulation of fat cell differentiation           | 0.00082 |
| GO:0048513 | animal organ development                                  | 0.00084 |
| GO:0048762 | mesenchymal cell differentiation                          | 0.00085 |
| GO:0002009 | morphogenesis of an epithelium                            | 0.00086 |
| GO:0019722 | calcium-mediated signaling                                | 0.00089 |
| GO:0048754 | branching morphogenesis of an epithelial tube             | 0.00094 |
| GO:0007159 | leukocyte cell-cell adhesion                              | 0.00095 |
| GO:0009187 | cyclic nucleotide metabolic process                       | 0.00095 |
| GO:0031622 | positive regulation of fever generation                   | 0.00095 |
| GO:0045834 | positive regulation of lipid metabolic process            | 0.00095 |



|            |                                                                |         |
|------------|----------------------------------------------------------------|---------|
| GO:1903900 | regulation of viral life cycle                                 | 0.00095 |
| GO:0043269 | regulation of ion transport                                    | 0.00096 |
| GO:0050777 | negative regulation of immune response                         | 0.00097 |
| GO:0030856 | regulation of epithelial cell differentiation                  | 0.00099 |
| GO:0019932 | second-messenger-mediated signaling                            | 0.001   |
| GO:0042221 | response to chemical                                           | 0.001   |
| GO:0044260 | cellular macromolecule metabolic process                       | 0.001   |
| GO:0060284 | regulation of cell development                                 | 0.001   |
| GO:0009653 | anatomical structure morphogenesis                             | 0.0011  |
| GO:0015031 | protein transport                                              | 0.0011  |
| GO:0032667 | regulation of interleukin-23 production                        | 0.0011  |
| GO:0042045 | epithelial fluid transport                                     | 0.0011  |
| GO:0043066 | negative regulation of apoptotic process                       | 0.0011  |
| GO:0043085 | positive regulation of catalytic activity                      | 0.0011  |
| GO:0043170 | macromolecule metabolic process                                | 0.0011  |
| GO:0045080 | positive regulation of chemokine biosynthetic process          | 0.0011  |
| GO:0045931 | positive regulation of mitotic cell cycle                      | 0.0011  |
| GO:0070372 | regulation of ERK1 and ERK2 cascade                            | 0.0011  |
| GO:0072577 | endothelial cell apoptotic process                             | 0.0011  |
| GO:0030855 | epithelial cell differentiation                                | 0.0012  |
| GO:0043536 | positive regulation of blood vessel endothelial cell migration | 0.0012  |
| GO:0045840 | positive regulation of mitotic nuclear division                | 0.0012  |
| GO:0051051 | negative regulation of transport                               | 0.0012  |
| GO:0051726 | regulation of cell cycle                                       | 0.0012  |
| GO:0002016 | regulation of blood volume by renin-angiotensin                | 0.0013  |
| GO:0032722 | positive regulation of chemokine production                    | 0.0013  |
| GO:0040008 | regulation of growth                                           | 0.0013  |
| GO:0016043 | cellular component organization                                | 0.0014  |
| GO:0030593 | neutrophil chemotaxis                                          | 0.0014  |
| GO:0033043 | regulation of organelle organization                           | 0.0014  |
| GO:0001525 | angiogenesis                                                   | 0.0015  |
| GO:0002696 | positive regulation of leukocyte activation                    | 0.0015  |
| GO:0006915 | apoptotic process                                              | 0.0015  |
| GO:0006937 | regulation of muscle contraction                               | 0.0015  |
| GO:0006996 | organelle organization                                         | 0.0015  |
| GO:0019062 | virion attachment to host cell                                 | 0.0015  |
| GO:0019229 | regulation of vasoconstriction                                 | 0.0015  |
| GO:0032308 | positive regulation of prostaglandin secretion                 | 0.0015  |
| GO:0035721 | intraciliary retrograde transport                              | 0.0015  |
| GO:0046886 | positive regulation of hormone biosynthetic process            | 0.0015  |

|            |                                                                              |        |
|------------|------------------------------------------------------------------------------|--------|
| GO:0140056 | organelle localization by membrane tethering                                 | 0.0015 |
| GO:2001225 | regulation of chloride transport                                             | 0.0015 |
| GO:0003018 | vascular process in circulatory system                                       | 0.0016 |
| GO:0014823 | response to activity                                                         | 0.0016 |
| GO:0042325 | regulation of phosphorylation                                                | 0.0016 |
| GO:0044703 | multi-organism reproductive process                                          | 0.0016 |
| GO:0046677 | response to antibiotic                                                       | 0.0016 |
| GO:0060627 | regulation of vesicle-mediated transport                                     | 0.0016 |
| GO:0001780 | neutrophil homeostasis                                                       | 0.0017 |
| GO:0002507 | tolerance induction                                                          | 0.0017 |
| GO:0002923 | regulation of humoral immune response mediated by circulating immunoglobulin | 0.0017 |
| GO:0042482 | positive regulation of odontogenesis                                         | 0.0017 |
| GO:0044237 | cellular metabolic process                                                   | 0.0017 |
| GO:0044238 | primary metabolic process                                                    | 0.0017 |
| GO:0046824 | positive regulation of nucleocytoplasmic transport                           | 0.0017 |
| GO:0065008 | regulation of biological quality                                             | 0.0017 |
| GO:1904322 | cellular response to forskolin                                               | 0.0017 |
| GO:0001776 | leukocyte homeostasis                                                        | 0.0018 |
| GO:0009967 | positive regulation of signal transduction                                   | 0.0018 |
| GO:0032270 | positive regulation of cellular protein metabolic process                    | 0.0018 |
| GO:0032677 | regulation of interleukin-8 production                                       | 0.0018 |
| GO:0032729 | positive regulation of interferon-gamma production                           | 0.0018 |
| GO:0044089 | positive regulation of cellular component biogenesis                         | 0.0018 |
| GO:0006952 | defense response                                                             | 0.0019 |
| GO:0032940 | secretion by cell                                                            | 0.0019 |
| GO:0050764 | regulation of phagocytosis                                                   | 0.0019 |
| GO:0061478 | response to platelet aggregation inhibitor                                   | 0.0019 |
| GO:1901224 | positive regulation of NIK/NF-kappaB signaling                               | 0.0019 |
| GO:1902117 | positive regulation of organelle assembly                                    | 0.0019 |
| GO:1903140 | regulation of establishment of endothelial barrier                           | 0.0019 |
| GO:0006807 | nitrogen compound metabolic process                                          | 0.002  |
| GO:0044130 | negative regulation of growth of symbiont in host                            | 0.002  |
| GO:1902930 | regulation of alcohol biosynthetic process                                   | 0.002  |
| GO:1903531 | negative regulation of secretion by cell                                     | 0.002  |
| GO:0050731 | positive regulation of peptidyl-tyrosine phosphorylation                     | 0.0021 |
| GO:0062012 | regulation of small molecule metabolic process                               | 0.0021 |
| GO:0034762 | regulation of transmembrane transport                                        | 0.0022 |
| GO:0035821 | modification of morphology or physiology of other organism                   | 0.0022 |

|            |                                                                                      |        |
|------------|--------------------------------------------------------------------------------------|--------|
| GO:0055117 | regulation of cardiac muscle contraction                                             | 0.0022 |
| GO:1901654 | response to ketone                                                                   | 0.0022 |
| GO:0009987 | cellular process                                                                     | 0.0023 |
| GO:0035729 | cellular response to hepatocyte growth factor stimulus                               | 0.0023 |
| GO:0044126 | regulation of growth of symbiont in host                                             | 0.0023 |
| GO:0044146 | negative regulation of growth of symbiont involved in interaction with host          | 0.0025 |
| GO:0045408 | regulation of interleukin-6 biosynthetic process                                     | 0.0025 |
| GO:0050930 | induction of positive chemotaxis                                                     | 0.0025 |
| GO:0001775 | cell activation                                                                      | 0.0026 |
| GO:0031100 | animal organ regeneration                                                            | 0.0026 |
| GO:0050870 | positive regulation of T cell activation                                             | 0.0026 |
| GO:0070374 | positive regulation of ERK1 and ERK2 cascade                                         | 0.0027 |
| GO:0009214 | cyclic nucleotide catabolic process                                                  | 0.0028 |
| GO:0010638 | positive regulation of organelle organization                                        | 0.0028 |
| GO:0030949 | positive regulation of vascular endothelial growth factor receptor signaling pathway | 0.0028 |
| GO:0044144 | modulation of growth of symbiont involved in interaction with host                   | 0.0028 |
| GO:0051044 | positive regulation of membrane protein ectodomain proteolysis                       | 0.0028 |
| GO:0008016 | regulation of heart contraction                                                      | 0.0029 |
| GO:1901888 | regulation of cell junction assembly                                                 | 0.0029 |
| GO:0002702 | positive regulation of production of molecular mediator of immune response           | 0.003  |
| GO:0010827 | regulation of glucose transmembrane transport                                        | 0.003  |
| GO:0010888 | negative regulation of lipid storage                                                 | 0.003  |
| GO:0050810 | regulation of steroid biosynthetic process                                           | 0.003  |
| GO:0051023 | regulation of immunoglobulin secretion                                               | 0.003  |
| GO:0045069 | regulation of viral genome replication                                               | 0.0031 |
| GO:0048524 | positive regulation of viral process                                                 | 0.0031 |
| GO:0008015 | blood circulation                                                                    | 0.0032 |
| GO:0009966 | regulation of signal transduction                                                    | 0.0032 |
| GO:0019216 | regulation of lipid metabolic process                                                | 0.0032 |
| GO:0051128 | regulation of cellular component organization                                        | 0.0032 |
| GO:0022414 | reproductive process                                                                 | 0.0033 |
| GO:0032682 | negative regulation of chemokine production                                          | 0.0033 |
| GO:0045787 | positive regulation of cell cycle                                                    | 0.0033 |
| GO:2000727 | positive regulation of cardiac muscle cell differentiation                           | 0.0033 |
| GO:0002726 | positive regulation of T cell cytokine production                                    | 0.0035 |
| GO:0010829 | negative regulation of glucose transmembrane transport                               | 0.0035 |

|            |                                                                                              |        |
|------------|----------------------------------------------------------------------------------------------|--------|
| GO:1901655 | cellular response to ketone                                                                  | 0.0035 |
| GO:1902074 | response to salt                                                                             | 0.0035 |
| GO:0007275 | multicellular organism development                                                           | 0.0036 |
| GO:0042102 | positive regulation of T cell proliferation                                                  | 0.0036 |
| GO:0097191 | extrinsic apoptotic signaling pathway                                                        | 0.0037 |
| GO:0016192 | vesicle-mediated transport                                                                   | 0.0039 |
| GO:0098542 | defense response to other organism                                                           | 0.0044 |
| GO:0048016 | inositol phosphate-mediated signaling                                                        | 0.0045 |
| GO:0050995 | negative regulation of lipid catabolic process                                               | 0.0045 |
| GO:0006606 | protein import into nucleus                                                                  | 0.0046 |
| GO:0032368 | regulation of lipid transport                                                                | 0.0046 |
| GO:0097305 | response to alcohol                                                                          | 0.0046 |
| GO:1901564 | organonitrogen compound metabolic process                                                    | 0.0046 |
| GO:0045926 | negative regulation of growth                                                                | 0.0047 |
| GO:0009059 | macromolecule biosynthetic process                                                           | 0.0048 |
| GO:0035813 | regulation of renal sodium excretion                                                         | 0.0048 |
| GO:0048568 | embryonic organ development                                                                  | 0.0049 |
| GO:2001237 | negative regulation of extrinsic apoptotic signaling pathway                                 | 0.0049 |
| GO:0033138 | positive regulation of peptidyl-serine phosphorylation                                       | 0.005  |
| GO:0045672 | positive regulation of osteoclast differentiation                                            | 0.0051 |
| GO:0002683 | negative regulation of immune system process                                                 | 0.0052 |
| GO:0003014 | renal system process                                                                         | 0.0052 |
| GO:0009790 | embryo development                                                                           | 0.0052 |
| GO:0045930 | negative regulation of mitotic cell cycle                                                    | 0.0052 |
| GO:0051817 | modification of morphology or physiology of other organism involved in symbiotic interaction | 0.0052 |
| GO:0045321 | leukocyte activation                                                                         | 0.0053 |
| GO:0071677 | positive regulation of mononuclear cell migration                                            | 0.0054 |
| GO:2000778 | positive regulation of interleukin-6 secretion                                               | 0.0054 |
| GO:0006959 | humoral immune response                                                                      | 0.0058 |
| GO:0048585 | negative regulation of response to stimulus                                                  | 0.0058 |
| GO:0050709 | negative regulation of protein secretion                                                     | 0.0058 |
| GO:0042592 | homeostatic process                                                                          | 0.0059 |
| GO:0006950 | response to stress                                                                           | 0.006  |
| GO:0007568 | aging                                                                                        | 0.006  |
| GO:0010575 | positive regulation of vascular endothelial growth factor production                         | 0.0061 |
| GO:0042981 | regulation of apoptotic process                                                              | 0.0061 |
| GO:0045662 | negative regulation of myoblast differentiation                                              | 0.0061 |
| GO:0003008 | system process                                                                               | 0.0062 |
| GO:0034763 | negative regulation of transmembrane transport                                               | 0.0063 |
| GO:0035066 | positive regulation of histone acetylation                                                   | 0.0064 |

|            |                                                                                                                                       |        |
|------------|---------------------------------------------------------------------------------------------------------------------------------------|--------|
| GO:0046058 | cAMP metabolic process                                                                                                                | 0.0064 |
| GO:1902105 | regulation of leukocyte differentiation                                                                                               | 0.0064 |
| GO:0002768 | immune response-regulating cell surface receptor signaling pathway                                                                    | 0.0067 |
| GO:0044249 | cellular biosynthetic process                                                                                                         | 0.0067 |
| GO:0048731 | system development                                                                                                                    | 0.0068 |
| GO:0060428 | lung epithelium development                                                                                                           | 0.0068 |
| GO:0010613 | positive regulation of cardiac muscle hypertrophy                                                                                     | 0.0072 |
| GO:0032743 | positive regulation of interleukin-2 production                                                                                       | 0.0072 |
| GO:0046068 | cGMP metabolic process                                                                                                                | 0.0072 |
| GO:0090023 | positive regulation of neutrophil chemotaxis                                                                                          | 0.0072 |
| GO:0009636 | response to toxic substance                                                                                                           | 0.0073 |
| GO:0090068 | positive regulation of cell cycle process                                                                                             | 0.0073 |
| GO:0009154 | purine ribonucleotide catabolic process                                                                                               | 0.0075 |
| GO:0019538 | protein metabolic process                                                                                                             | 0.0075 |
| GO:0030212 | hyaluronan metabolic process                                                                                                          | 0.0075 |
| GO:0035774 | positive regulation of insulin secretion involved in cellular response to glucose stimulus                                            | 0.0075 |
| GO:0046330 | positive regulation of JNK cascade                                                                                                    | 0.0075 |
| GO:0048565 | digestive tract development                                                                                                           | 0.0075 |
| GO:0050869 | negative regulation of B cell activation                                                                                              | 0.0075 |
| GO:0090316 | positive regulation of intracellular protein transport                                                                                | 0.0075 |
| GO:1901890 | positive regulation of cell junction assembly                                                                                         | 0.0075 |
| GO:0051482 | positive regulation of cytosolic calcium ion concentration involved in phospholipase C-activating G protein-coupled signaling pathway | 0.0078 |
| GO:0071363 | cellular response to growth factor stimulus                                                                                           | 0.0078 |
| GO:0062013 | positive regulation of small molecule metabolic process                                                                               | 0.0079 |
| GO:0006464 | cellular protein modification process                                                                                                 | 0.008  |
| GO:0046887 | positive regulation of hormone secretion                                                                                              | 0.008  |
| GO:0048871 | multicellular organismal homeostasis                                                                                                  | 0.008  |
| GO:0055023 | positive regulation of cardiac muscle tissue growth                                                                                   | 0.0081 |
| GO:0090322 | regulation of superoxide metabolic process                                                                                            | 0.0081 |
| GO:1903829 | positive regulation of cellular protein localization                                                                                  | 0.0083 |
| GO:0045191 | regulation of isotype switching                                                                                                       | 0.0085 |
| GO:0048566 | embryonic digestive tract development                                                                                                 | 0.0085 |
| GO:0097421 | liver regeneration                                                                                                                    | 0.0085 |
| GO:0003012 | muscle system process                                                                                                                 | 0.0086 |
| GO:0032965 | regulation of collagen biosynthetic process                                                                                           | 0.0089 |
| GO:2000249 | regulation of actin cytoskeleton reorganization                                                                                       | 0.0089 |
| GO:0001505 | regulation of neurotransmitter levels                                                                                                 | 0.009  |
| GO:0051246 | regulation of protein metabolic process                                                                                               | 0.0091 |

|            |                                                                                   |        |
|------------|-----------------------------------------------------------------------------------|--------|
| GO:0019048 | modulation by virus of host process                                               | 0.0092 |
| GO:1901031 | regulation of response to reactive oxygen species                                 | 0.0092 |
| GO:0031329 | regulation of cellular catabolic process                                          | 0.0093 |
| GO:1902107 | positive regulation of leukocyte differentiation                                  | 0.0093 |
| GO:0002891 | positive regulation of immunoglobulin mediated immune response                    | 0.0096 |
| GO:0045823 | positive regulation of heart contraction                                          | 0.0096 |
| GO:2000785 | regulation of autophagosome assembly                                              | 0.0096 |
| GO:2001240 | negative regulation of extrinsic apoptotic signaling pathway in absence of ligand | 0.0096 |
| GO:0016485 | protein processing                                                                | 0.0097 |
| GO:0051092 | positive regulation of NF-kappaB transcription factor activity                    | 0.0097 |
| GO:0006904 | vesicle docking involved in exocytosis                                            | 0.01   |
| GO:0030316 | osteoclast differentiation                                                        | 0.01   |
| GO:0031018 | endocrine pancreas development                                                    | 0.01   |
| GO:0051930 | regulation of sensory perception of pain                                          | 0.01   |
| GO:0071548 | response to dexamethasone                                                         | 0.01   |
| GO:0045786 | negative regulation of cell cycle                                                 | 0.0101 |
| GO:0019953 | sexual reproduction                                                               | 0.0103 |
| GO:1905515 | non-motile cilium assembly                                                        | 0.0103 |
| GO:0060341 | regulation of cellular localization                                               | 0.0104 |
| GO:0002521 | leukocyte differentiation                                                         | 0.0105 |
| GO:0003002 | regionalization                                                                   | 0.0105 |
| GO:1903034 | regulation of response to wounding                                                | 0.0106 |
| GO:0000187 | activation of MAPK activity                                                       | 0.0107 |
| GO:0006887 | exocytosis                                                                        | 0.0108 |
| GO:0051235 | maintenance of location                                                           | 0.0109 |
| GO:0001959 | regulation of cytokine-mediated signaling pathway                                 | 0.011  |
| GO:0002790 | peptide secretion                                                                 | 0.0114 |
| GO:0042307 | positive regulation of protein import into nucleus                                | 0.0116 |
| GO:0048738 | cardiac muscle tissue development                                                 | 0.0116 |
| GO:0050918 | positive chemotaxis                                                               | 0.012  |
| GO:0051248 | negative regulation of protein metabolic process                                  | 0.0121 |
| GO:0051897 | positive regulation of protein kinase B signaling                                 | 0.0121 |
| GO:0002639 | positive regulation of immunoglobulin production                                  | 0.0125 |
| GO:1901135 | carbohydrate derivative metabolic process                                         | 0.0125 |
| GO:0051171 | regulation of nitrogen compound metabolic process                                 | 0.0126 |
| GO:0006796 | phosphate-containing compound metabolic process                                   | 0.0127 |
| GO:0006953 | acute-phase response                                                              | 0.0128 |

|            |                                                                |        |
|------------|----------------------------------------------------------------|--------|
| GO:0010718 | positive regulation of epithelial to mesenchymal transition    | 0.0128 |
| GO:0044060 | regulation of endocrine process                                | 0.0128 |
| GO:0032970 | regulation of actin filament-based process                     | 0.0131 |
| GO:2000112 | regulation of cellular macromolecule biosynthetic process      | 0.0133 |
| GO:0048639 | positive regulation of developmental growth                    | 0.0135 |
| GO:0035722 | interleukin-12-mediated signaling pathway                      | 0.0137 |
| GO:0045933 | positive regulation of muscle contraction                      | 0.0137 |
| GO:0050766 | positive regulation of phagocytosis                            | 0.0137 |
| GO:0044283 | small molecule biosynthetic process                            | 0.014  |
| GO:0032147 | activation of protein kinase activity                          | 0.0141 |
| GO:0032757 | positive regulation of interleukin-8 production                | 0.0141 |
| GO:0006355 | regulation of transcription, DNA-templated                     | 0.0142 |
| GO:0048646 | anatomical structure formation involved in morphogenesis       | 0.0143 |
| GO:0051640 | organelle localization                                         | 0.0144 |
| GO:0010468 | regulation of gene expression                                  | 0.0145 |
| GO:0035094 | response to nicotine                                           | 0.0145 |
| GO:0050832 | defense response to fungus                                     | 0.0145 |
| GO:0032268 | regulation of cellular protein metabolic process               | 0.0146 |
| GO:0051130 | positive regulation of cellular component organization         | 0.0149 |
| GO:1901136 | carbohydrate derivative catabolic process                      | 0.0153 |
| GO:0019219 | regulation of nucleobase-containing compound metabolic process | 0.0155 |
| GO:0080090 | regulation of primary metabolic process                        | 0.0162 |
| GO:0060688 | regulation of morphogenesis of a branching structure           | 0.0163 |
| GO:0030278 | regulation of ossification                                     | 0.0165 |
| GO:0002520 | immune system development                                      | 0.0168 |
| GO:0006979 | response to oxidative stress                                   | 0.0172 |
| GO:0071385 | cellular response to glucocorticoid stimulus                   | 0.0173 |
| GO:0000302 | response to reactive oxygen species                            | 0.0182 |
| GO:0051052 | regulation of DNA metabolic process                            | 0.0183 |
| GO:1901215 | negative regulation of neuron death                            | 0.0187 |
| GO:0003006 | developmental process involved in reproduction                 | 0.0189 |
| GO:0014032 | neural crest cell development                                  | 0.0189 |
| GO:0050710 | negative regulation of cytokine secretion                      | 0.0189 |
| GO:0060255 | regulation of macromolecule metabolic process                  | 0.0189 |
| GO:0022008 | neurogenesis                                                   | 0.0192 |
| GO:0030858 | positive regulation of epithelial cell differentiation         | 0.0192 |
| GO:1901137 | carbohydrate derivative biosynthetic process                   | 0.0192 |
| GO:1903902 | positive regulation of viral life cycle                        | 0.0192 |

|            |                                                                    |        |
|------------|--------------------------------------------------------------------|--------|
| GO:0097237 | cellular response to toxic substance                               | 0.0194 |
| GO:0030072 | peptide hormone secretion                                          | 0.0198 |
| GO:0046888 | negative regulation of hormone secretion                           | 0.0198 |
| GO:0071356 | cellular response to tumor necrosis factor                         | 0.0198 |
| GO:0048732 | gland development                                                  | 0.0202 |
| GO:0002223 | stimulatory C-type lectin receptor signaling pathway               | 0.0208 |
| GO:0048015 | phosphatidylinositol-mediated signaling                            | 0.0208 |
| GO:0050891 | multicellular organismal water homeostasis                         | 0.0208 |
| GO:0001558 | regulation of cell growth                                          | 0.0212 |
| GO:0006468 | protein phosphorylation                                            | 0.0214 |
| GO:0043583 | ear development                                                    | 0.0214 |
| GO:0070301 | cellular response to hydrogen peroxide                             | 0.0218 |
| GO:2000027 | regulation of animal organ morphogenesis                           | 0.0222 |
| GO:1901992 | positive regulation of mitotic cell cycle phase transition         | 0.0224 |
| GO:0009612 | response to mechanical stimulus                                    | 0.0228 |
| GO:0098876 | vesicle-mediated transport to the plasma membrane                  | 0.0228 |
| GO:0044706 | multi-multicellular organism process                               | 0.0231 |
| GO:0048010 | vascular endothelial growth factor receptor signaling pathway      | 0.0233 |
| GO:0032868 | response to insulin                                                | 0.0235 |
| GO:0010648 | negative regulation of cell communication                          | 0.0236 |
| GO:0001837 | epithelial to mesenchymal transition                               | 0.0239 |
| GO:0023057 | negative regulation of signaling                                   | 0.0239 |
| GO:0009150 | purine ribonucleotide metabolic process                            | 0.0248 |
| GO:0008283 | cell population proliferation                                      | 0.0249 |
| GO:0030279 | negative regulation of ossification                                | 0.0255 |
| GO:0043507 | positive regulation of JUN kinase activity                         | 0.0255 |
| GO:0045596 | negative regulation of cell differentiation                        | 0.0257 |
| GO:0010564 | regulation of cell cycle process                                   | 0.0259 |
| GO:0034103 | regulation of tissue remodeling                                    | 0.0267 |
| GO:0030098 | lymphocyte differentiation                                         | 0.0269 |
| GO:1900407 | regulation of cellular response to oxidative stress                | 0.0273 |
| GO:0008306 | associative learning                                               | 0.0278 |
| GO:0030100 | regulation of endocytosis                                          | 0.0278 |
| GO:0032943 | mononuclear cell proliferation                                     | 0.0285 |
| GO:0002429 | immune response-activating cell surface receptor signaling pathway | 0.0292 |
| GO:0071260 | cellular response to mechanical stimulus                           | 0.0297 |
| GO:0055007 | cardiac muscle cell differentiation                                | 0.0304 |
| GO:0048519 | negative regulation of biological process                          | 0.0307 |



|            |                                                                           |        |
|------------|---------------------------------------------------------------------------|--------|
| GO:0032088 | negative regulation of NF-kappaB transcription factor activity            | 0.031  |
| GO:0050871 | positive regulation of B cell activation                                  | 0.031  |
| GO:0090066 | regulation of anatomical structure size                                   | 0.0321 |
| GO:1901362 | organic cyclic compound biosynthetic process                              | 0.0323 |
| GO:0045778 | positive regulation of ossification                                       | 0.033  |
| GO:0042742 | defense response to bacterium                                             | 0.0341 |
| GO:0007193 | adenylate cyclase-inhibiting G protein-coupled receptor signaling pathway | 0.0342 |
| GO:0071158 | positive regulation of cell cycle arrest                                  | 0.0342 |
| GO:0051345 | positive regulation of hydrolase activity                                 | 0.0344 |
| GO:0001657 | ureteric bud development                                                  | 0.0348 |
| GO:0110020 | regulation of actomyosin structure organization                           | 0.0348 |
| GO:0044772 | mitotic cell cycle phase transition                                       | 0.0351 |
| GO:0090287 | regulation of cellular response to growth factor stimulus                 | 0.0351 |
| GO:0009953 | dorsal/ventral pattern formation                                          | 0.0352 |
| GO:0097327 | response to antineoplastic agent                                          | 0.0352 |
| GO:0009628 | response to abiotic stimulus                                              | 0.0357 |
| GO:0031023 | microtubule organizing center organization                                | 0.0357 |
| GO:0050878 | regulation of body fluid levels                                           | 0.0357 |
| GO:0010720 | positive regulation of cell development                                   | 0.0375 |
| GO:0006885 | regulation of pH                                                          | 0.0379 |
| GO:0021782 | glial cell development                                                    | 0.0379 |
| GO:0048609 | multicellular organismal reproductive process                             | 0.038  |
| GO:0007267 | cell-cell signaling                                                       | 0.0386 |
| GO:0042552 | myelination                                                               | 0.0392 |
| GO:0120034 | positive regulation of plasma membrane bounded cell projection assembly   | 0.0392 |
| GO:0007030 | Golgi organization                                                        | 0.0405 |
| GO:0097711 | ciliary basal body-plasma membrane docking                                | 0.0405 |
| GO:0048699 | generation of neurons                                                     | 0.0409 |
| GO:0006275 | regulation of DNA replication                                             | 0.0411 |
| GO:0010558 | negative regulation of macromolecule biosynthetic process                 | 0.0411 |
| GO:0044281 | small molecule metabolic process                                          | 0.0411 |
| GO:0009895 | negative regulation of catabolic process                                  | 0.0414 |
| GO:0006493 | protein O-linked glycosylation                                            | 0.0416 |
| GO:0007423 | sensory organ development                                                 | 0.0428 |
| GO:0002250 | adaptive immune response                                                  | 0.0437 |
| GO:0010506 | regulation of autophagy                                                   | 0.0459 |
| GO:0043200 | response to amino acid                                                    | 0.0461 |
| GO:0001666 | response to hypoxia                                                       | 0.0466 |
| GO:0007399 | nervous system development                                                | 0.0472 |

|            |                                                      |        |
|------------|------------------------------------------------------|--------|
| GO:0010876 | lipid localization                                   | 0.0486 |
| GO:0031327 | negative regulation of cellular biosynthetic process | 0.0487 |
| GO:0034654 | nucleobase-containing compound biosynthetic process  | 0.0498 |

**Molecular function (GO)**

|            |                                                           |          |
|------------|-----------------------------------------------------------|----------|
| GO:0005125 | cytokine activity                                         | 1.56E-06 |
| GO:0048018 | receptor ligand activity                                  | 1.61E-05 |
| GO:0005126 | cytokine receptor binding                                 | 4.26E-05 |
| GO:0005515 | protein binding                                           | 0.00015  |
| GO:0005488 | binding                                                   | 0.0016   |
| GO:0030551 | cyclic nucleotide binding                                 | 0.0017   |
| GO:0005102 | signaling receptor binding                                | 0.0018   |
| GO:0098772 | molecular function regulator                              | 0.0018   |
| GO:0070851 | growth factor receptor binding                            | 0.0028   |
| GO:0046790 | virion binding                                            | 0.0035   |
| GO:0008083 | growth factor activity                                    | 0.005    |
| GO:0016018 | cyclosporin A binding                                     | 0.0069   |
| GO:0030553 | cGMP binding                                              | 0.0069   |
| GO:0001618 | virus receptor activity                                   | 0.007    |
| GO:0004114 | 3',5'-cyclic-nucleotide phosphodiesterase activity        | 0.0162   |
| GO:0045505 | dynein intermediate chain binding                         | 0.0183   |
| GO:0097367 | carbohydrate derivative binding                           | 0.0183   |
| GO:0001103 | RNA polymerase II repressing transcription factor binding | 0.0186   |
| GO:0001664 | G protein-coupled receptor binding                        | 0.0186   |
| GO:0051959 | dynein light intermediate chain binding                   | 0.0186   |
| GO:0003774 | motor activity                                            | 0.0209   |
| GO:0017111 | nucleoside-triphosphatase activity                        | 0.0297   |
| GO:0016787 | hydrolase activity                                        | 0.0361   |
| GO:0003823 | antigen binding                                           | 0.0449   |
| GO:0032555 | purine ribonucleotide binding                             | 0.0466   |

**Cellular component (GO)**

|            |                                 |          |
|------------|---------------------------------|----------|
| GO:0097542 | ciliary tip                     | 8.64E-06 |
| GO:0005615 | extracellular space             | 0.00024  |
| GO:0005813 | centrosome                      | 0.00024  |
| GO:0005815 | microtubule organizing center   | 0.00024  |
| GO:0036064 | ciliary basal body              | 0.00024  |
| GO:0005929 | cilium                          | 0.00033  |
| GO:0005868 | cytoplasmic dynein complex      | 0.00035  |
| GO:0015630 | microtubule cytoskeleton        | 0.00077  |
| GO:0030990 | intraciliary transport particle | 0.00077  |
| GO:0005576 | extracellular region            | 0.0019   |

|            |                                                      |        |
|------------|------------------------------------------------------|--------|
| GO:0120025 | plasma membrane bounded cell projection              | 0.0022 |
| GO:0009986 | cell surface                                         | 0.0042 |
| GO:0012505 | endomembrane system                                  | 0.0042 |
| GO:0031514 | motile cilium                                        | 0.0043 |
| GO:0099503 | secretory vesicle                                    | 0.0043 |
| GO:0032838 | plasma membrane bounded cell projection<br>cytoplasm | 0.0048 |
| GO:0005886 | plasma membrane                                      | 0.0089 |
| GO:0030141 | secretory granule                                    | 0.0089 |
| GO:0030992 | intraciliary transport particle B                    | 0.0089 |
| GO:0005856 | cytoskeleton                                         | 0.0098 |
| GO:0005930 | axoneme                                              | 0.0112 |
| GO:0097546 | ciliary base                                         | 0.0133 |
| GO:0005814 | centriole                                            | 0.0153 |
| GO:0031410 | cytoplasmic vesicle                                  | 0.0153 |
| GO:0032991 | protein-containing complex                           | 0.0199 |
| GO:0055037 | recycling endosome                                   | 0.0267 |
| GO:0030136 | clathrin-coated vesicle                              | 0.0296 |
| GO:0045177 | apical part of cell                                  | 0.0339 |
| GO:0099512 | supramolecular fiber                                 | 0.0341 |
| GO:0005622 | intracellular                                        | 0.0348 |
| GO:0005874 | microtubule                                          | 0.0348 |
| GO:0035869 | ciliary transition zone                              | 0.0348 |
| GO:0099513 | polymeric cytoskeletal fiber                         | 0.0377 |
| GO:0031093 | platelet alpha granule lumen                         | 0.0416 |
| GO:0009897 | external side of plasma membrane                     | 0.0453 |
| GO:0055038 | recycling endosome membrane                          | 0.0466 |

**Local network cluster (String)**

|          |                                                                               |          |
|----------|-------------------------------------------------------------------------------|----------|
| CL:20274 | mixed, incl. Ciliopathy, and dynein complex                                   | 2.57E-09 |
| CL:20424 | intraciliary transport involved in cilium assembly,<br>and BBSome             | 9.10E-08 |
| CL:20426 | intraciliary transport involved in cilium assembly                            | 7.06E-07 |
| CL:20428 | intraciliary transport particle                                               | 7.71E-06 |
| CL:20560 | RFX DNA-binding domain, and multi-ciliated<br>epithelial cell differentiation | 0.00011  |
| CL:20562 | RFX1 transcription activation region, and Poxvirus<br>D5 protein-like         | 0.0015   |
| CL:22274 | cGMP catabolic process, and Haem-NO-binding                                   | 0.0042   |
| CL:20430 | intraciliary transport particle B                                             | 0.0086   |
| CL:3903  | Jak-STAT signaling pathway                                                    | 0.0271   |

**KEGG pathways**

|          |                                                      |          |
|----------|------------------------------------------------------|----------|
| hsa04933 | AGE-RAGE signaling pathway in diabetic complications | 2.30E-09 |
| hsa05144 | Malaria                                              | 4.11E-08 |
| hsa05321 | Inflammatory bowel disease (IBD)                     | 1.28E-07 |
| hsa05323 | Rheumatoid arthritis                                 | 5.31E-07 |
| hsa04060 | Cytokine-cytokine receptor interaction               | 7.11E-07 |
| hsa04657 | IL-17 signaling pathway                              | 7.11E-07 |
| hsa05142 | Chagas disease (American trypanosomiasis)            | 7.11E-07 |
| hsa05146 | Amoebiasis                                           | 7.11E-07 |
| hsa05152 | Tuberculosis                                         | 7.11E-07 |
| hsa05133 | Pertussis                                            | 4.92E-06 |
| hsa05143 | African trypanosomiasis                              | 9.47E-06 |
| hsa04659 | Th17 cell differentiation                            | 1.87E-05 |
| hsa04962 | Vasopressin-regulated water reabsorption             | 2.08E-05 |
| hsa05134 | Legionellosis                                        | 4.17E-05 |
| hsa05166 | HTLV-I infection                                     | 6.74E-05 |
| hsa04932 | Non-alcoholic fatty liver disease (NAFLD)            | 8.36E-05 |
| hsa05140 | Leishmaniasis                                        | 9.11E-05 |
| hsa04218 | Cellular senescence                                  | 9.22E-05 |
| hsa04022 | cGMP-PKG signaling pathway                           | 9.84E-05 |
| hsa05164 | Influenza A                                          | 0.00012  |
| hsa05132 | Salmonella infection                                 | 0.00015  |
| hsa01523 | Antifolate resistance                                | 0.00023  |
| hsa05200 | Pathways in cancer                                   | 0.00026  |
| hsa04620 | Toll-like receptor signaling pathway                 | 0.00027  |
| hsa04668 | TNF signaling pathway                                | 0.00031  |
| hsa05332 | Graft-versus-host disease                            | 0.00031  |
| hsa04380 | Osteoclast differentiation                           | 0.0005   |
| hsa04672 | Intestinal immune network for IgA production         | 0.0005   |
| hsa04926 | Relaxin signaling pathway                            | 0.00055  |
| hsa05161 | Hepatitis B                                          | 0.00074  |
| hsa04010 | MAPK signaling pathway                               | 0.001    |
| hsa04621 | NOD-like receptor signaling pathway                  | 0.0012   |
| hsa04924 | Renin secretion                                      | 0.0012   |
| hsa04927 | Cortisol synthesis and secretion                     | 0.0012   |
| hsa05202 | Transcriptional misregulation in cancer              | 0.0012   |
| hsa05168 | Herpes simplex infection                             | 0.0015   |
| hsa05410 | Hypertrophic cardiomyopathy (HCM)                    | 0.002    |
| hsa04350 | TGF-beta signaling pathway                           | 0.0021   |
| hsa04540 | Gap junction                                         | 0.0024   |
| hsa05414 | Dilated cardiomyopathy (DCM)                         | 0.0024   |
| hsa04064 | NF-kappa B signaling pathway                         | 0.0027   |
| hsa04640 | Hematopoietic cell lineage                           | 0.0027   |

|          |                                                   |        |
|----------|---------------------------------------------------|--------|
| hsa04972 | Pancreatic secretion                              | 0.0027 |
| hsa04660 | T cell receptor signaling pathway                 | 0.003  |
| hsa04614 | Renin-angiotensin system                          | 0.0033 |
| hsa05145 | Toxoplasmosis                                     | 0.0038 |
| hsa04114 | Oocyte meiosis                                    | 0.0044 |
| hsa05310 | Asthma                                            | 0.0044 |
| hsa04110 | Cell cycle                                        | 0.005  |
| hsa04068 | FoxO signaling pathway                            | 0.0057 |
| hsa05020 | Prion diseases                                    | 0.0057 |
| hsa05162 | Measles                                           | 0.0058 |
| hsa05418 | Fluid shear stress and atherosclerosis            | 0.0058 |
| hsa05330 | Allograft rejection                               | 0.006  |
| hsa04072 | Phospholipase D signaling pathway                 | 0.007  |
| hsa04940 | Type I diabetes mellitus                          | 0.0074 |
| hsa04934 | Cushing's syndrome                                | 0.0079 |
| hsa04217 | Necroptosis                                       | 0.008  |
| hsa05010 | Alzheimer's disease                               | 0.0098 |
| hsa05110 | Vibrio cholerae infection                         | 0.0098 |
| hsa00230 | Purine metabolism                                 | 0.0103 |
| hsa05014 | Amyotrophic lateral sclerosis (ALS)               | 0.0103 |
| hsa04020 | Calcium signaling pathway                         | 0.011  |
| hsa04923 | Regulation of lipolysis in adipocytes             | 0.011  |
| hsa05167 | Kaposi's sarcoma-associated herpesvirus infection | 0.0113 |
| hsa04024 | cAMP signaling pathway                            | 0.0132 |
| hsa04623 | Cytosolic DNA-sensing pathway                     | 0.0141 |
| hsa04622 | RIG-I-like receptor signaling pathway             | 0.0175 |
| hsa04976 | Bile secretion                                    | 0.0177 |
| hsa04971 | Gastric acid secretion                            | 0.0179 |
| hsa04970 | Salivary secretion                                | 0.0247 |
| hsa05032 | Morphine addiction                                | 0.027  |
| hsa04750 | Inflammatory mediator regulation of TRP channels  | 0.0272 |
| hsa01522 | Endocrine resistance                              | 0.0274 |
| hsa04713 | Circadian entrainment                             | 0.0274 |
| hsa04914 | Progesterone-mediated oocyte maturation           | 0.0274 |
| hsa04925 | Aldosterone synthesis and secretion               | 0.0274 |
| hsa05322 | Systemic lupus erythematosus                      | 0.0274 |
| hsa04066 | HIF-1 signaling pathway                           | 0.0283 |
| hsa04916 | Melanogenesis                                     | 0.0283 |
| hsa04931 | Insulin resistance                                | 0.0324 |
| hsa04724 | Glutamatergic synapse                             | 0.0349 |
| hsa04270 | Vascular smooth muscle contraction                | 0.0385 |
| hsa04152 | AMPK signaling pathway                            | 0.0387 |
| hsa04611 | Platelet activation                               | 0.04   |

|          |                                           |        |
|----------|-------------------------------------------|--------|
| hsa04650 | Natural killer cell mediated cytotoxicity | 0.0401 |
| hsa05160 | Hepatitis C                               | 0.0438 |
| hsa04371 | Apelin signaling pathway                  | 0.0446 |
| hsa04915 | Estrogen signaling pathway                | 0.0446 |
| hsa04261 | Adrenergic signaling in cardiomyocytes    | 0.0472 |

**Reactome pathways**

|             |                                                                                    |          |
|-------------|------------------------------------------------------------------------------------|----------|
| HSA-6785807 | Interleukin-4 and Interleukin-13 signaling                                         | 3.96E-07 |
| HSA-5617833 | Cilium Assembly                                                                    | 4.23E-07 |
| HSA-6783783 | Interleukin-10 signaling                                                           | 3.24E-06 |
| HSA-5620924 | Intraflagellar transport                                                           | 3.91E-06 |
| HSA-162582  | Signal Transduction                                                                | 7.55E-06 |
| HSA-449147  | Signaling by Interleukins                                                          | 5.27E-05 |
| HSA-168256  | Immune System                                                                      | 0.0038   |
| HSA-5621481 | C-type lectin receptors (CLRs)                                                     | 0.0038   |
| HSA-110056  | MAPK3 (ERK1) activation                                                            | 0.005    |
| HSA-2025928 | Calcineurin activates NFAT                                                         | 0.005    |
| HSA-111885  | Opioid Signalling                                                                  | 0.0121   |
| HSA-2565942 | Regulation of PLK1 Activity at G2/M Transition                                     | 0.0122   |
| HSA-418457  | cGMP effects                                                                       | 0.0122   |
| HSA-5620912 | Anchoring of the basal body to the plasma membrane                                 | 0.0154   |
| HSA-180024  | DARPP-32 events                                                                    | 0.017    |
| HSA-5610787 | Hedgehog 'off' state                                                               | 0.0171   |
| HSA-114452  | Activation of BH3-only proteins                                                    | 0.0218   |
| HSA-114608  | Platelet degranulation                                                             | 0.0235   |
| HSA-8950505 | Gene and protein expression by JAK-STAT signaling after Interleukin-12 stimulation | 0.0313   |
| HSA-2559583 | Cellular Senescence                                                                | 0.0386   |
| HSA-5620920 | Cargo trafficking to the periciliary membrane                                      | 0.044    |
| HSA-109582  | Hemostasis                                                                         | 0.0491   |
| HSA-375276  | Peptide ligand-binding receptors                                                   | 0.0491   |

**Annotated Keyword (Uniprot)**

|         |                                    |          |
|---------|------------------------------------|----------|
| KW-0970 | Cilium biogenesis/degradation      | 1.43E-07 |
| KW-0964 | Secreted                           | 1.82E-05 |
| KW-0202 | Cytokine                           | 5.24E-05 |
| KW-0969 | Cilium                             | 0.00027  |
| KW-0243 | Dynein                             | 0.00093  |
| KW-0497 | Mitogen                            | 0.0014   |
| KW-1186 | Ciliopathy                         | 0.0028   |
| KW-0142 | cGMP-binding                       | 0.0029   |
| KW-1183 | Host cell receptor for virus entry | 0.0043   |
| KW-0325 | Glycoprotein                       | 0.0105   |

|         |                        |        |
|---------|------------------------|--------|
| KW-0206 | Cytoskeleton           | 0.0128 |
| KW-0945 | Host-virus interaction | 0.0128 |
| KW-0966 | Cell projection        | 0.0128 |
| KW-1015 | Disulfide bond         | 0.0128 |
| KW-0339 | Growth factor          | 0.015  |
| KW-0505 | Motor protein          | 0.015  |
| KW-0449 | Lipoprotein            | 0.025  |
| KW-1003 | Cell membrane          | 0.025  |
| KW-0519 | Myristate              | 0.0296 |
| KW-0550 | Obesity                | 0.0358 |
| KW-0010 | Activator              | 0.0439 |

**Protein domain (SMART)**

|         |                                                              |        |
|---------|--------------------------------------------------------------|--------|
| SM00471 | Metal dependent phosphohydrolases with conserved 'HD' motif. | 0.0352 |
| SM00382 | ATPases associated with a variety of cellular activities     | 0.0418 |

GO: gene ontology; KEGG: Kyoto encyclopedia of gene and genomes; pfam: Protein family database; SMART: Simple modular architecture research tool.

**Table S3:** List of differentially expressed transcripts related to mucociliary clearance machinery in SARS-CoV-2 infected patients relative to healthy individuals.

| <b>Transcript</b> | <b>Log2 fold change (L2FC)</b> | <b>Adjusted p-value (<i>p</i><sub>adj</sub>)</b> |
|-------------------|--------------------------------|--------------------------------------------------|
| <i>cdk1</i>       | -1.0488                        | 0.29                                             |
| <i>mcm3</i>       | -1.0490                        | 0.10                                             |
| <i>dynll1</i>     | -0.7203                        | 0.42                                             |
| <i>rab8A</i>      | 0.8100                         | 0.43                                             |
| <i>atmin</i>      | -0.0939                        | 0.93                                             |
| <i>ift20</i>      | -0.1036                        | NA                                               |
| <i>ift88</i>      | -0.4510                        | NA                                               |
| <i>bbs1</i>       | -0.1335                        | NA                                               |
| <i>dync2h1</i>    | -1.0211                        | 0.46                                             |
| <i>dync2li1</i>   | -0.6204                        | NA                                               |
| <i>rfx3</i>       | -1.0636                        | 0.28                                             |
| <i>foxJ1</i>      | -0.5372                        | 0.61                                             |
| <i>mcidas</i>     | -0.2076                        | NA                                               |
| <i>adcyl3</i>     | 0.0428                         | NA                                               |
| <i>pde4B</i>      | 2.1212                         | 0.12                                             |
| <i>pde5A</i>      | -0.1159                        | NA                                               |
| <i>prkg2</i>      | -1.1511                        | NA                                               |
| <i>cxcl8</i>      | 1.3257                         | 0.40                                             |
| <i>IL1B</i>       | 0.3393                         | 0.85                                             |
| <i>IL10</i>       | 0.0791                         | NA                                               |
| <i>IL17A</i>      | 2.6590                         | NA                                               |
| <i>IL6</i>        | -2.8900                        | NA                                               |

|                |         |      |
|----------------|---------|------|
| <i>tnf</i>     | -1.0534 | NA   |
| <i>edn1</i>    | 0.6971  | NA   |
| <i>cfr</i>     | -0.5268 | NA   |
| <i>agtR1</i>   | -0.3530 | NA   |
| <i>muc5AC</i>  | -0.3723 | 0.69 |
| <i>ace2</i>    | 1.2246  | NA   |
| <i>tmprss2</i> | -1.4190 | NA   |
| <i>ppia</i>    | -1.2904 | 0.12 |
| <i>ppp3r1</i>  | -0.2516 | 0.82 |

## References

1. Szklarczyk, D.; Morris, J.H.; Cook, H.; Kuhn, M.; Wyder, S.; Simonovic, M.; Santos, A.; Doncheva, N.T.; Roth, A.; Bork, P., et al. The STRING database in 2017: quality-controlled protein-protein association networks, made broadly accessible. *Nucleic Acids Res* 2017, *45*, D362-D368.
2. Benjamini, Y.; Hochberg, Y. Controlling the False Discovery Rate: A Practical and Powerful Approach to Multiple Testing. *Journal of the Royal Statistical Society: Series B (Methodological)* 1995, *57*, 289-300.
3. Shannon, P.; Markiel, A.; Ozier, O.; Baliga, N.S.; Wang, J.T.; Ramage, D.; Amin, N.; Schwikowski, B.; Ideker, T. Cytoscape: a software environment for integrated models of biomolecular interaction networks. *Genome Res* 2003, *13*, 2498-2504.
4. Brandes, U. A faster algorithm for betweenness centrality\*. *The Journal of Mathematical Sociology* 2001, *25*, 163-177.
5. Enright, A.J.; Van Dongen, S.; Ouzounis, C.A. An efficient algorithm for large-scale detection of protein families. *Nucleic Acids Res* 2002, *30*, 1575-1584.
6. Pratt, D.; Chen, J.; Welker, D.; Rivas, R.; Pillich, R.; Rynkov, V.; Ono, K.; Miello, C.; Hicks, L.; Szalma, S., et al. NDEx, the Network Data Exchange. *Cell Syst* 2015, *1*, 302-305.
7. Pratt, D.; Chen, J.; Pillich, R.; Rynkov, V.; Gary, A.; Demchak, B.; Ideker, T. NDEx 2.0: A Clearinghouse for Research on Cancer Pathways. *Cancer Res* 2017, *77*, e58-e61.
8. Pillich, R.T.; Chen, J.; Rynkov, V.; Welker, D.; Pratt, D. NDEx: A Community Resource for Sharing and Publishing of Biological Networks. *Methods Mol Biol* 2017, *1558*, 271-301.
9. Perfetto, L.; Pastrello, C.; Del-Toro, N.; Duesbury, M.; Iannuccelli, M.; Kotlyar, M.; Licata, L.; Meldal, B.; Panneerselvam, K.; Panni, S., et al. The IMEx Coronavirus interactome: an evolving map of Coronaviridae-Host molecular interactions. *bioRxiv* 2020.
10. Lieberman, N.A.P.; Peddu, V.; Xie, H.; Shrestha, L.; Huang, M.L.; Mears, M.C.; Cajimat, M.N.; Bente, D.A.; Shi, P.Y.; Bovier, F., et al. In vivo antiviral host transcriptional response to SARS-CoV-2 by viral load, sex, and age. *PLoS Biol* 2020, *18*, e3000849.
11. Love, M.I.; Huber, W.; Anders, S. Moderated estimation of fold change and dispersion for RNA-seq data with DESeq2. *Genome Biol* 2014, *15*, 550.
12. Team, R. *RStudio: Integrated Development for R*. RStudio, 2020.
